# Supplementary material
Source: PubMed Central journal article supplement (PMC10308372)
Supplement: EMBJ-42-e112559-s001.pdf [file EMBJ-42-e112559-s001.pdf]

# **Nicotinamide N-methyltransferase sustains a core epigenetic program that promotes metastatic colonization in breast cancer**

## **Appendix Figures**

### **Table of contents - Appendix Figures**

**Appendix Figure S1.** NNMT enhances tumor initiating capacity and stem features (**page 2**)

**Appendix Figure S2.** NNMT, metastasis and circulating tumor cells (CTC) shedding (**page 3**)

**Appendix Figure S3.** Expression of NNMT in luminal breast cancer cell line promotes tumor growth and metastasis (**page 4**)

**Appendix Figure S4.** NNMT depletion increases SAM and H3K9me3 abundance (**page 5**)

**Appendix Figure S5.** NNMT controls cancer cell metabolism by decreasing OXPHOS (**page 6**)

**Appendix Figure S6.** H3K9me3 ChIP-Seq analysis (**page 7**)

**Appendix Figure S7.** DNA methylation represses *COL1A1* and *PRDM5* expression upon NNMT ablation (**page 8**)

**Appendix Figure S8.** *COL1A1* ablation decreases tumorsphere formation (**page 9**)

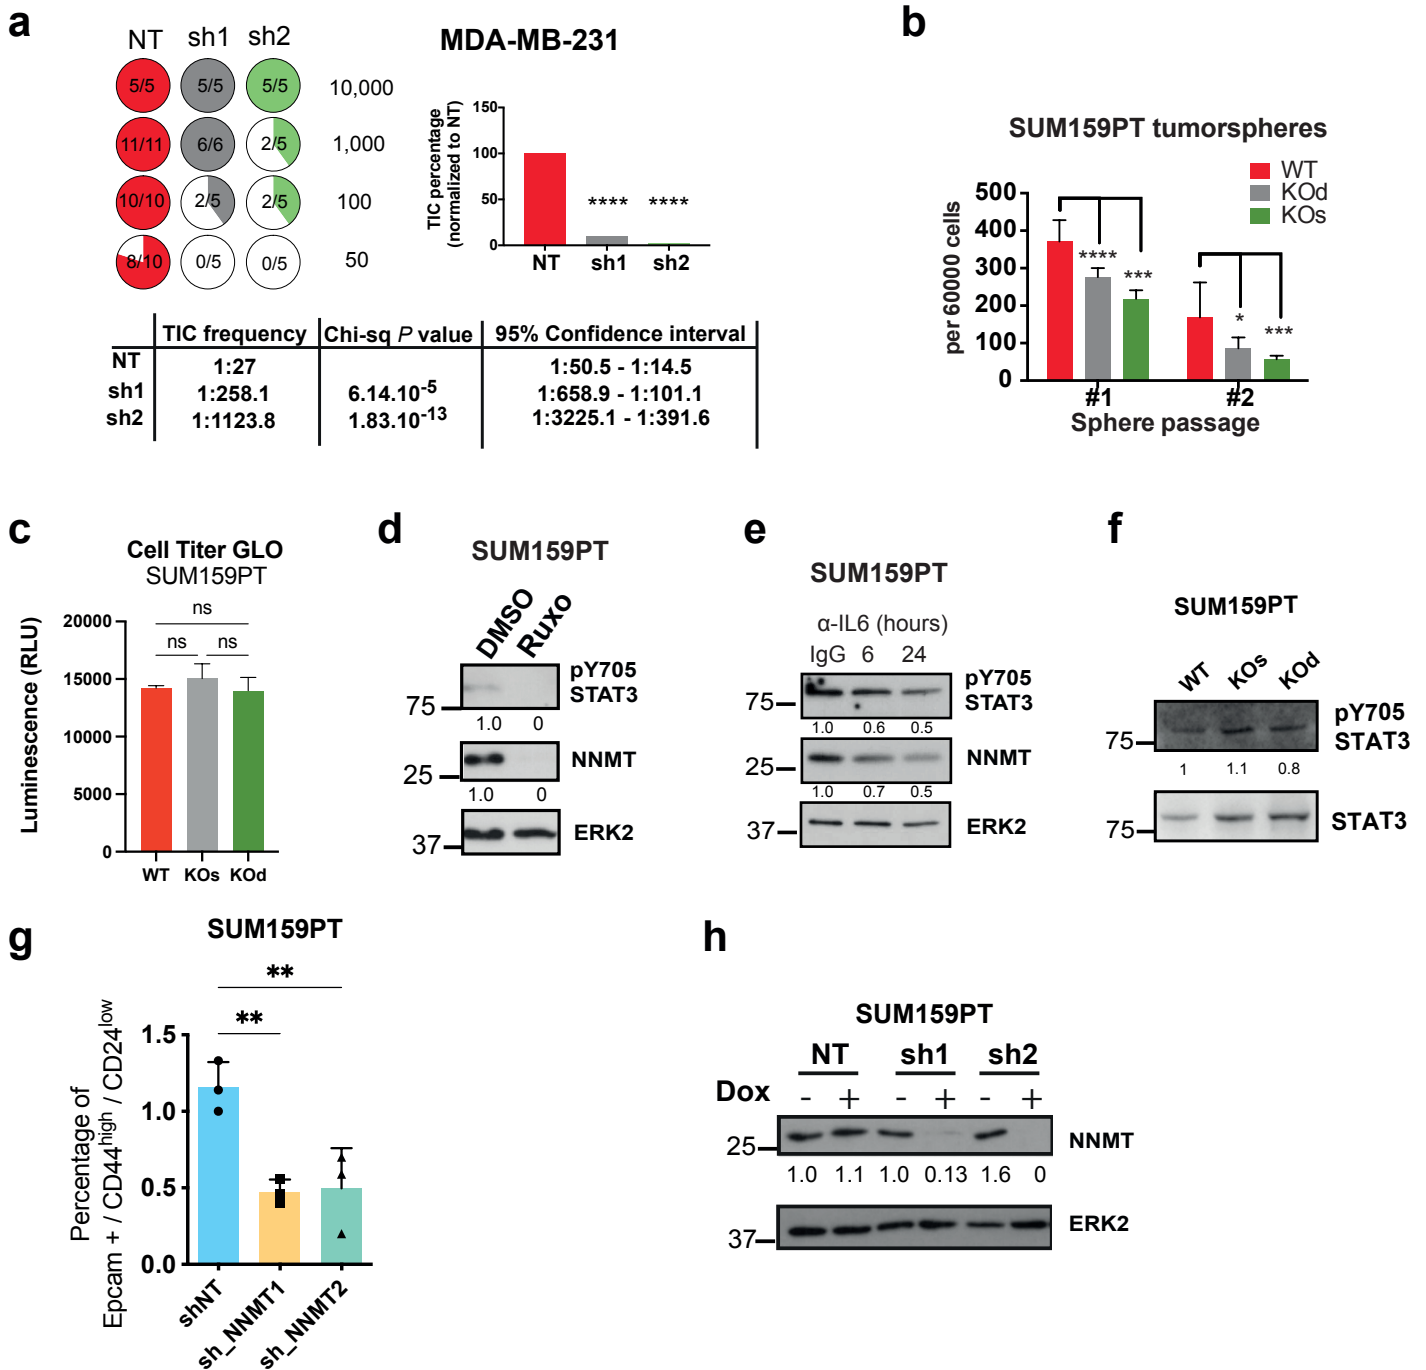

### Appendix Figure S1. NNMT enhances tumor initiating capacity and stem features.

**a.** Quantification of tumor incidence (pie charts) following orthotopic injection into NSG mice of MDA-MB-231 cells transfected with lentiviral vectors encoding sh NT (non-targeting), sh NNMT<sub>1</sub> and sh NNMT<sub>2</sub>. \*\*\*\**P* < 0.0001; Mann-Whitney test.

**b.** Bar plots showing primary (#1) and secondary (#2) tumorsphere numbers derived from SUM159PT WT, NNMT KOs and NNMT KOd cells NNMT. *n* = 9 data points, 3 biological replicates, each with 3 technical replicates. \**P* < 0.05, \*\**P* < 0.01, \*\*\**P* < 0.001; Mann-Whitney test. All data are mean ± SD.

**c.** Bar graph representing Cell-Titer GLO assay quantification from SUM159PT WT, KOd NNMT and KOd NNMT cells. *n* = 6 experimental replicates. n.s., non-significant; One-way ANOVA. All data are means ± SD.

**d.** Immunoblots showing the abundance of phospho-STAT3 Y705 and NNMT in SUM159PT treated with DMSO or JAK inhibitor Ruxolitinb. ERK2 was used as loading control.

**e.** Immunoblots showing the abundance of phospho-STAT3 Y705 and NNMT in SUM159PT treated with monoclonal IgG or anti-IL6 blocking antibodies (2.5 ug/ml, for 6h and 24h) in secondary tumor spheres. ERK2 was used as loading control.

**f.** Immunoblots showing the abundance of phospho-STAT3 Y705 and STAT3 in SUM159PT WT, KOs and KOd.

**g.** Bar plot quantification of Epcam (+), CD44 (high), and CD24 (low) SUM159PT cells by FACS, at day 6 of doxycycline-inducible knockdown of NNMT using two independent sh RNAs. *n* = 3 biological replicates. \*\**P* < 0.01; One-way ANOVA. Data are mean ± SD.

**h.** Immunoblots showing the abundance of NNMT in SUM159PT transfected with lentiviral doxycycline-inducible expression vectors encoding non-targeting or NNMT-targeting sh RNAs. ERK2 was used as loading control.

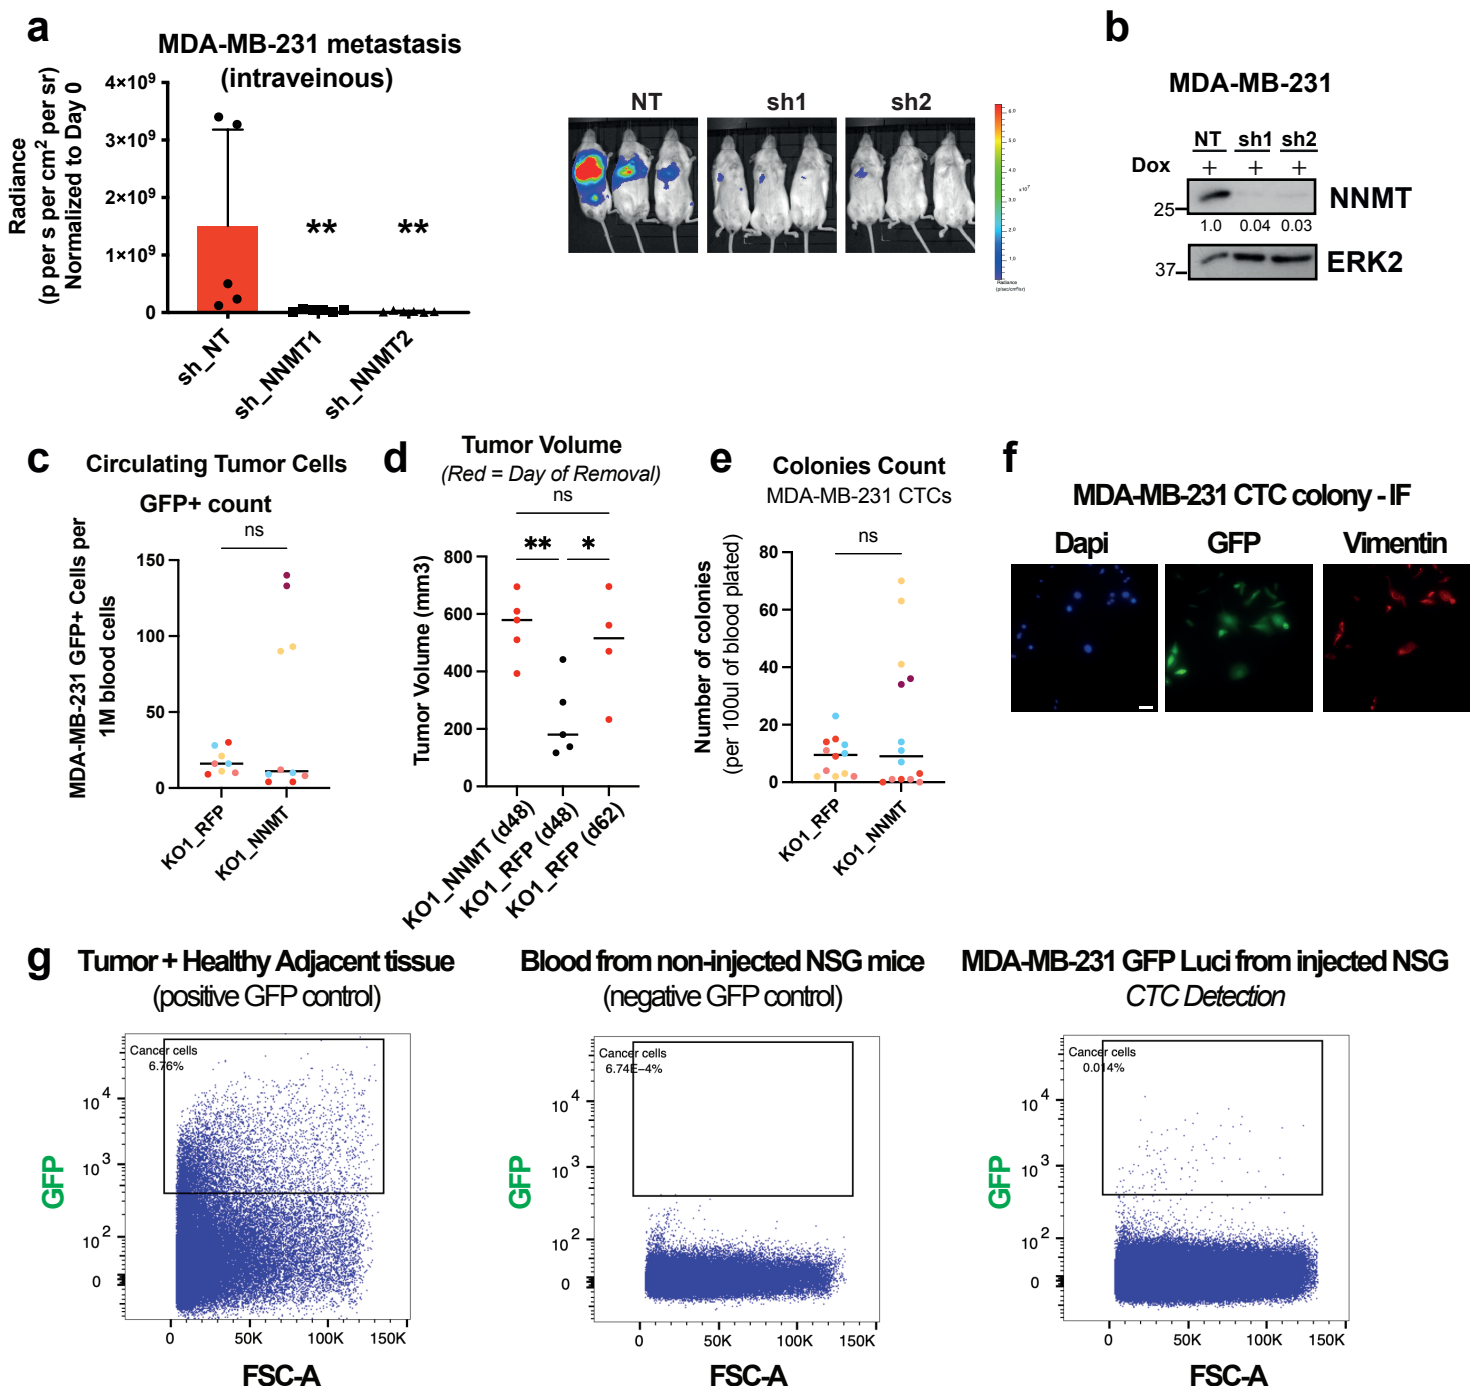

### Appendix Figure S2. NNMT, metastasis and circulating tumor cells (CTC) shedding.

**a.** Bar graph quantification and representative bioluminescence imaging of metastases at day 41 after injection of 100 000 MDA-MB-231 sh NT (non-targeting), sh NNMT<sub>1</sub> and sh NNMT<sub>2</sub> cells intravenously. Mice were fed with doxycycline food to sustain shRNA expression during the whole experiment. Representative images are shown.  $n = 5$  to  $6$  animals per group. \* $P < 0.05$ , \*\* $P < 0.01$ , \*\*\* $P < 0.001$ ; Mann-Whitney test. All data are mean  $\pm$  SD.

**b.** Immunoblots showing the abundance of NNMT in MDA-MB-231 transfected with lentiviral doxycycline-inducible expression vectors encoding non-targeting or NNMT-targeting sh RNAs. ERK2 was used as loading control.

**c.** Dot plot showing FACS quantification of GFP-positive circulating tumor cells (CTCs) analyzed from the blood of NSG mice, orthotopically injected with MDA-MB-231 KO1\_RFP or KO1\_NNMT breast cancer cells.  $n = 4$  to  $5$  animals per group, with 2 technical replicates. Mann-Whitney test.

**d.** Dot plot showing primary tumors volume measurement of MDA-MB-231 KO1\_RFP or KO1\_NNMT, at day 48 (removal of KO1\_NNMT tumors) and at day 62 (removal of KO1\_RFP tumors). Red dots indicated day of removal for the respective experimental conditions. At the day of removal, no significant difference between KO1\_RFP or KO1\_NNMT primary tumors was observed.  $n = 4$  to  $5$  animals per group. One-way ANOVA.

**e.** Dot plot showing quantification of circulating tumor cells (CTCs) derived colonies, after plating of 100ul of blood collected from MDA-MB-231 KO1\_RFP or KO1\_NNMT orthotopically injected NSG mice, in 10% FCS DMEM for 7 days.  $n = 4$  to  $5$  animals per group, with 2 to 3 technical replicates. n.s.: non-significant; Mann-Whitney test.

**f.** Representative images of immunostaining of CTC colonies grown for 8 days using Dapi, GFP and Vimentin, confirming the identify of MDA-MB-231 cells. 100 ul of blood was plated in DMEM using a 6-well plate format. Scale bar: 10  $\mu$ m.

**g.** Representative images FACS plot showing CTC detection using GFP fluorescence, in comparison to positive control (Tumor + Healthy adjacent tissue) and negative control (blood from non-injected mice).

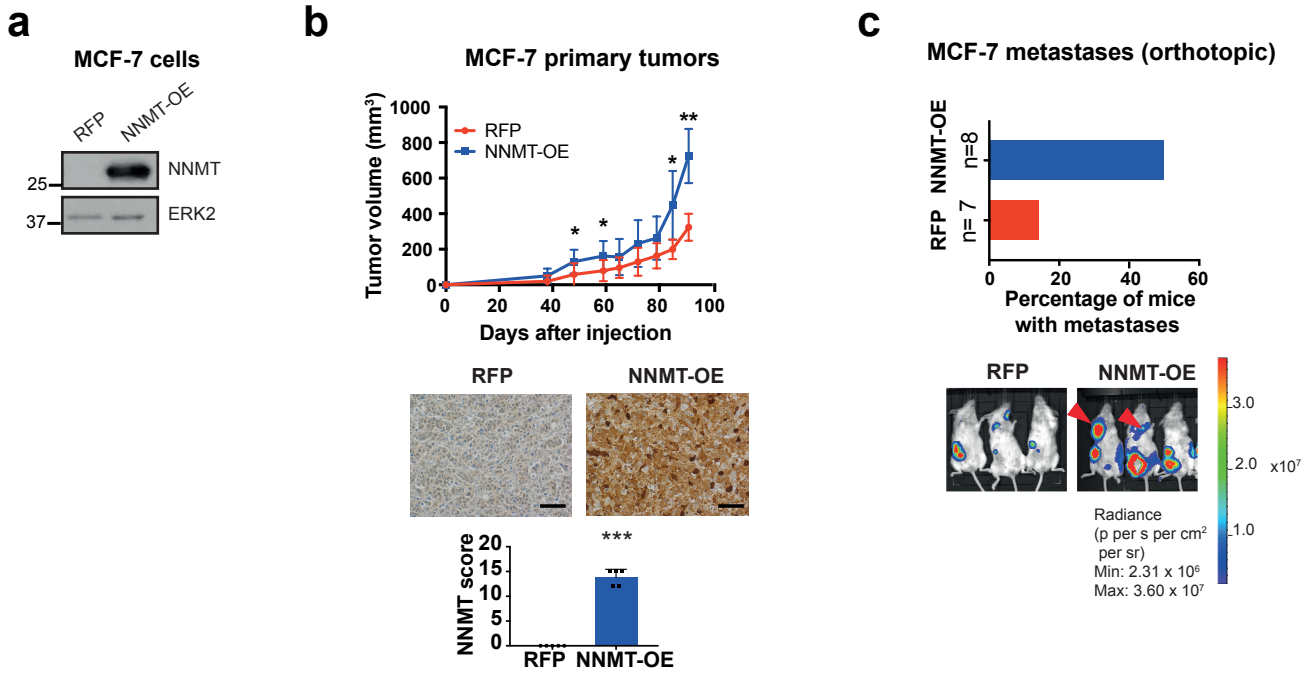

**Appendix Figure S3. Expression of NNMT in luminal breast cancer cell line promotes tumor growth and metastasis.**

**a**, Immunoblot showing levels of NNMT and ERK2 (loading control) in MCF-7 cells infected with a lentiviral RFP control vector or the full NNMT ORF sequence.

**b**, Upper panel: Kinetics of primary tumor growth of MCF-7\_RFP (n = 8 mice) and NNMT-overexpressing (OE) (n = 11 mice) sublines upon orthotopic injection of 100 000 cells. Lower panel: representative images of NNMT immunostaining in the primary tumors and respective quantification. \*P < 0.05, \*\*P < 0.01, \*\*\*P < 0.001; Mann-Whitney U-test. Data are means  $\pm$  SD. Scale bar: 100  $\mu$ m.

**c**, Upper panel: Bar graph quantification of the incidence of lymph node metastases in MCF-7\_RFP and NNMT-overexpressing (OE) cells; Lower panel: representative bioluminescence images of metastases formed after removal of the primary tumor from MCF-7\_RFP or NNMT-OE cells. Arrows indicate lymph node metastases.

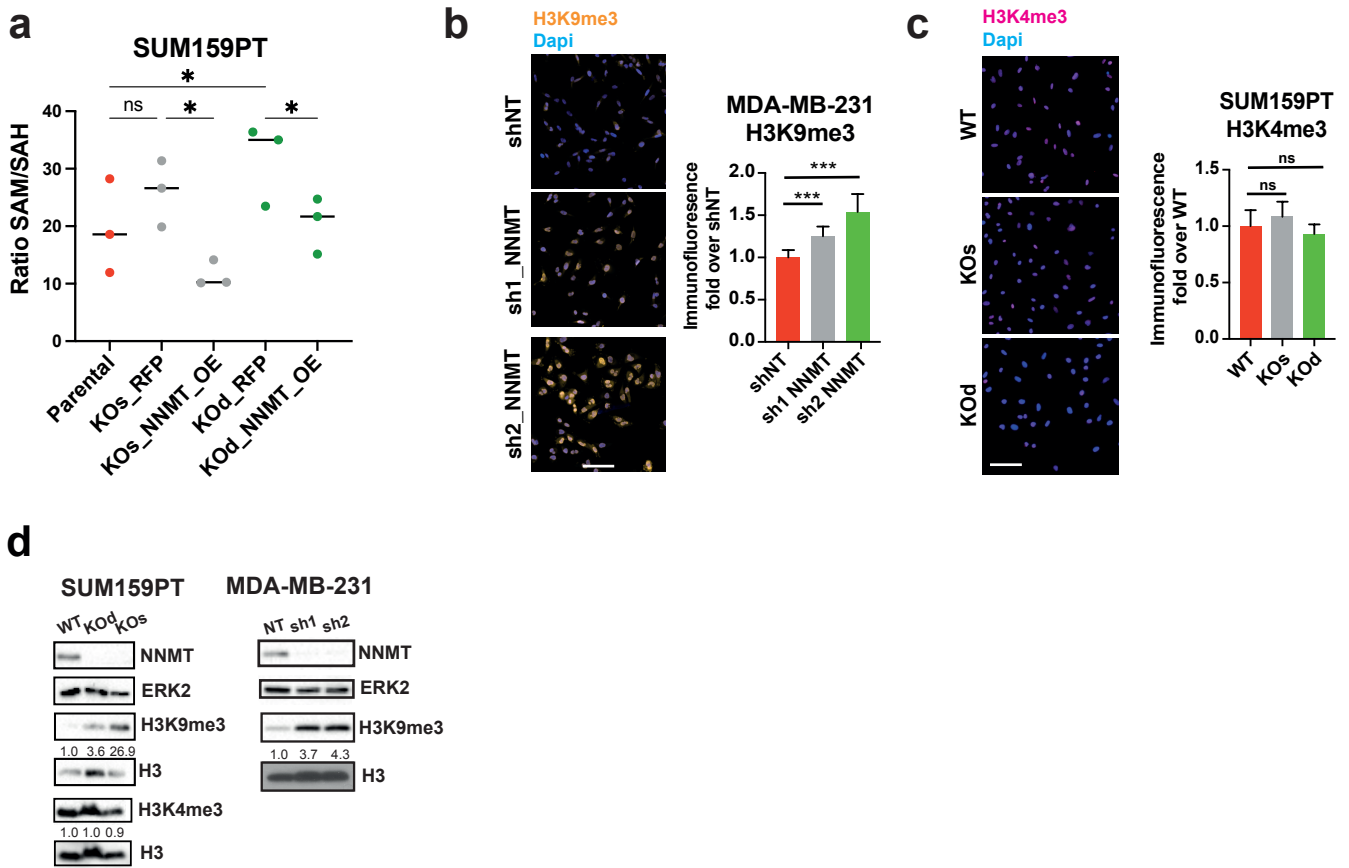

**Appendix Figure S4. NNMT depletion increases SAM and H3K9me3 abundance.**

**a**, Bar graph depicting ratio of S-adenosylmethionine (SAM): S-adenosylhomocysteine (SAH) in SUM159PT WT, KOd\_RFP, KOd\_NNMT\_OE (rescue NNMT), KOs\_RFP and KOs\_NNMT\_OE (rescue NNMT), profiled by mass-spectrometry. \* $P < 0.05$ ; One-way ANOVA.

**b**, Bar graph and images depicting H3K9me3 signal by immunofluorescence in MDA-MB-231 sh NT, sh1 NNMT, and sh2 NNMT cells.  $n = 3$  experimental replicates with 4 technical replicates each. \*\*\* $P < 0.001$ ; Kruskal-Wallis test. All data are means  $\pm$  SD. Scale bar: 50  $\mu$ m.

**c**, Bar graph and images depicting H3K4me3 signal by immunofluorescence in SUM159PT WT, KOs, and KOd cells.  $n = 3$  to 4 experimental replicates with 4 to 5 technical replicates each. n.s., not significant; Kruskal-Wallis test. All data are means  $\pm$  SD. Scale bar: 50  $\mu$ m.

**d**, Immunoblots showing upregulation of H3K9me3 in NNMT KO cells. ERK2 was used as a loading control for NNMT levels. H3 was used as loading control for H3K9me3 and H3K4me3 levels.

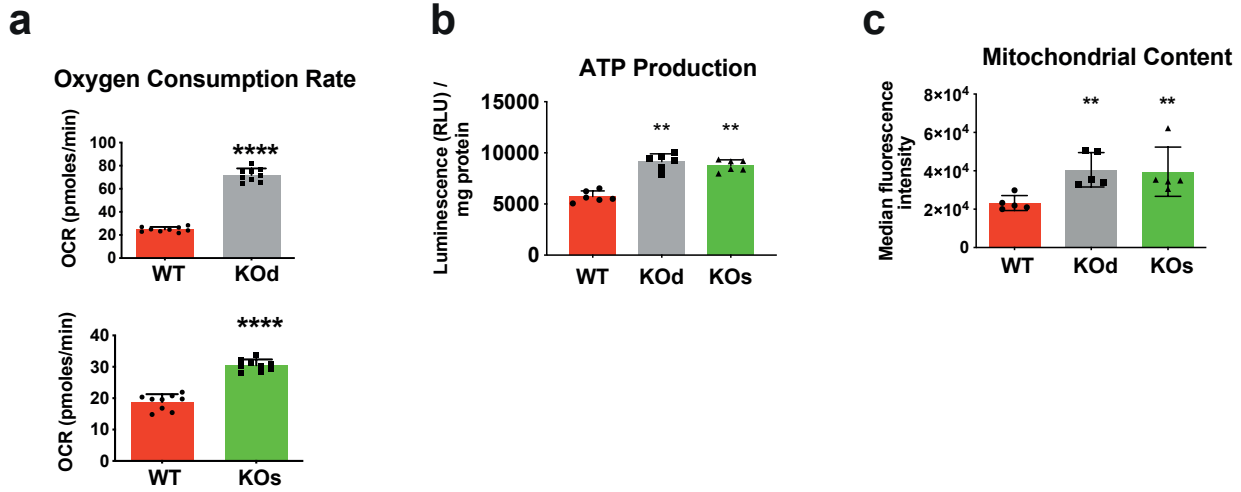

**Appendix Figure S5. NNMT controls cancer cell metabolism by decreasing OXPHOS.**

**a-c:** Bar plots quantification of basal oxygen consumption rates (n = 9, 3 experimental replicates, 3 technical replicates), ATP levels (n = 6, 3 experimental replicates, 2 technical replicates), and mitochondrial content (n = 5 experimental replicates) in SUM159PT KOd and KOs compared to WT cells. \*\*P < 0.01, \*\*\*\*P < 0.0001; Mann-Whitney U-test. Data are mean ± SD.

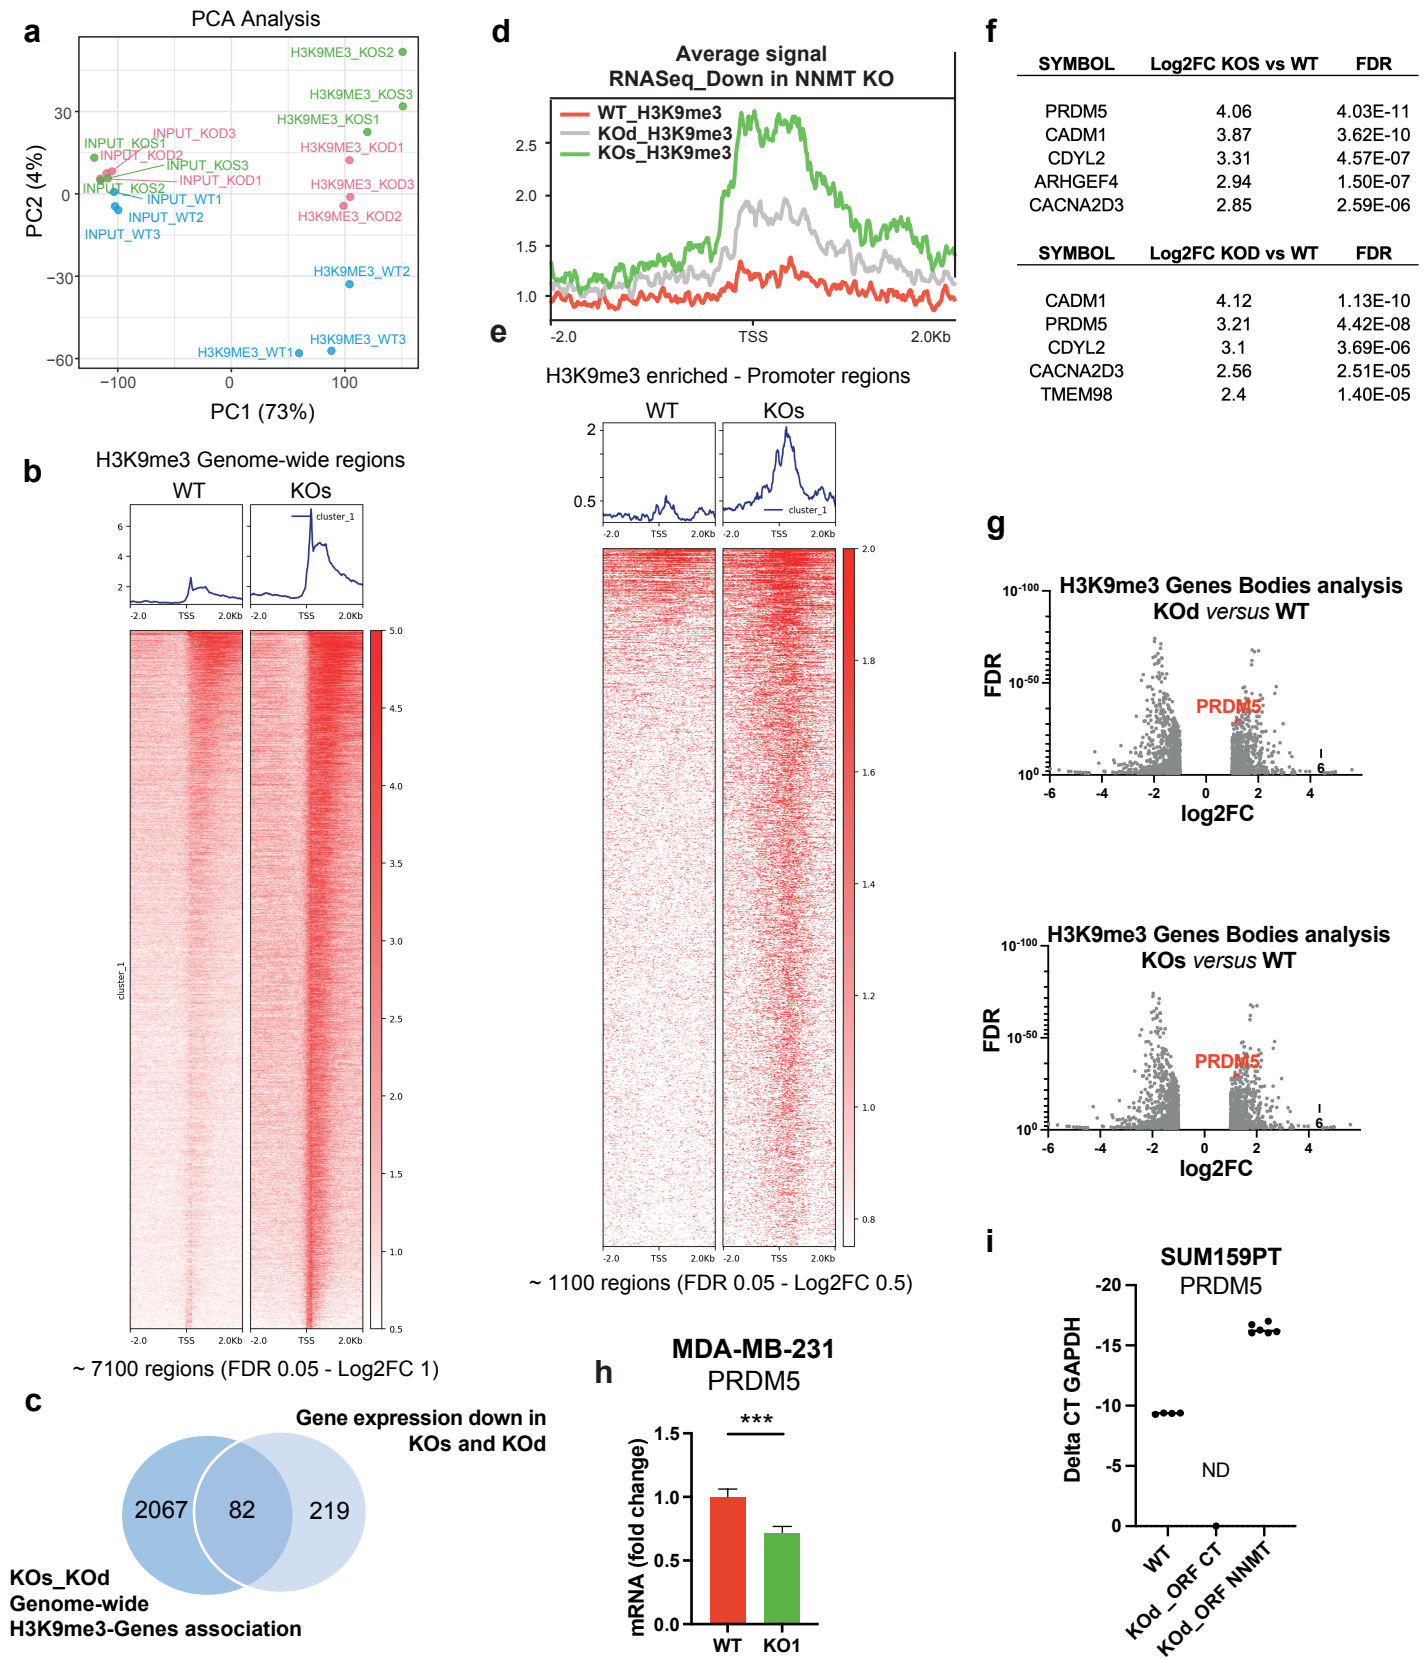

**Appendix Figure 6. H3K9me3 ChIP-Seq analysis.**

**a**, PCA plot depicting SUM159PT, KO<sub>s</sub> NNMT and KO<sub>d</sub> NNMT ChIP and Input samples.

**b**, H3K9me3 occupancy at peaks significantly enriched genome-wide in KO<sub>s</sub> condition versus WT (Log<sub>2</sub>FC 1, FDR > 0.05) assessed by ChIP-seq.

**c**, Venn diagram showing overlap between genes down-regulated upon NNMT knock-out and gene associated to H3K9me3 peak genome-wide in NNMT KO<sub>s</sub> and KO<sub>d</sub> cells in comparisons to WT. Peak-gene association was performed using GREAT software (Basal plus extension – settings: 5kb, 1kb, 50kb). 28% of the NNMT down-regulated genes are associated to H3K9me3 peaks.

**d**, H3K9me3 signal profile at TSS of the 301 genes significantly down-regulated upon NNMT KO identified by mRNA-sequencing (cut-off: adjusted P < 0.05) assessed by ChIP-seq of SUM159PT WT, KO<sub>s</sub>, and KO<sub>d</sub> cells.

**e**, H3K9me3 occupancy at TSS in SUM159PT KO<sub>s</sub> versus WT contrast (Log<sub>2</sub>FC 0.5, FDR > 0.05) assessed by ChIP-seq.

**f**, Tables depicting Top 5 H3K9me3 hypermethylated gene within the promoter for both KO<sub>s</sub> versus WT and KO<sub>d</sub> versus WT comparisons. Log<sub>2</sub>Fc and FDR are shown.

**g**, Volcano plots depicting H3K9me3 peaks (cut-off: Log<sub>2</sub>FC 1, FDR < 0.1) detected within gene bodies, for both KO<sub>s</sub> versus WT and KO<sub>d</sub> versus WT comparisons. PRDM5 is highlighted in red.

**h**, Bar graph representing average PRDM5 mRNA expression in MDA-MB-231 WT and KO1 cells. n = 3 experimental replicates with 2 technical replicates each. \*\*\*P < 0.001; Mann-Whitney U-test. All data are means ± SD.

**i**, Bar graph representing PRDM5 mRNA expression using Delta CT (GAPDH), in SUM159PT WT, KO<sub>s</sub>\_ORF CT and KO<sub>s</sub>\_ORF NNMT (rescue NNMT). Data were depicted as Delta CT as PRDM5 was undetected in SUM159 KO<sub>s</sub>\_ORF CT sample. n = 2 to 3 experimental replicates.

**a**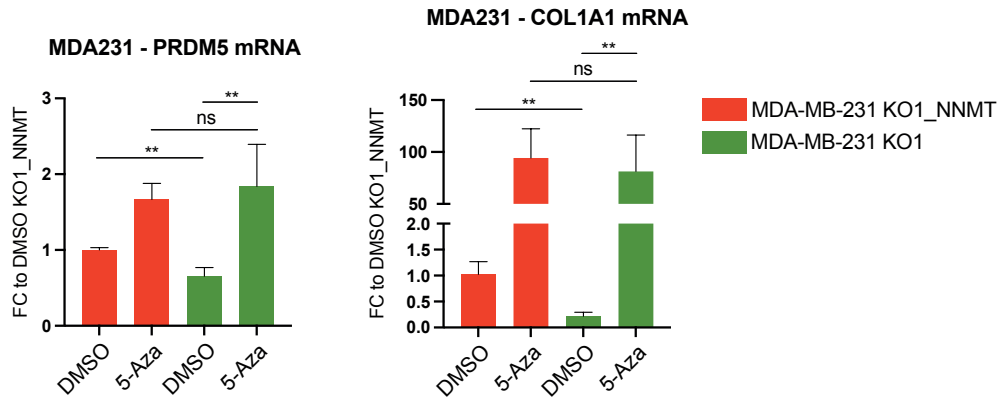**b**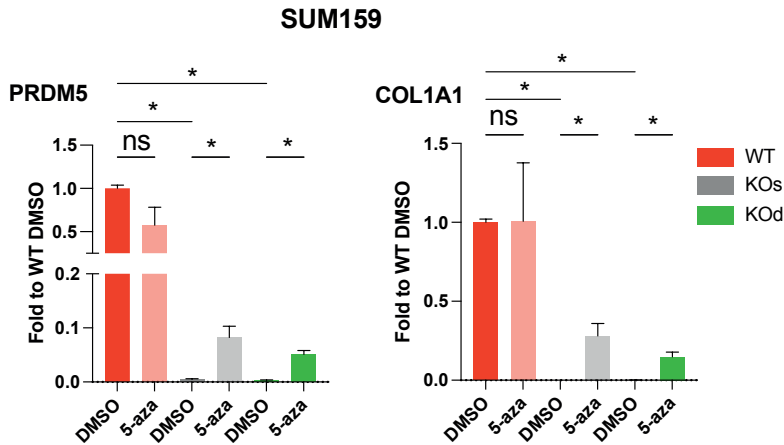

**Appendix Figure S7. DNA methylation represses COL1A1 and PRDM5 expression upon NNMT ablation.**

**a**, Bar graphs representing PRDM5 and COL1A1 mRNA expression upon 5-aza treatment (2  $\mu$ M for 6 days) in MDA-MB-231 KO1\_NNMT and KO1\_RFP cells.  $n = 3$  replicates.  $**P < 0.01$ , n.s., not significant; Mann-Whitney U-test. Data are means  $\pm$  SD.

**b**, Bar graphs representing PRDM5 and COL1A1 mRNA expression two weeks after 5-aza removal from the medium, in NNMT WT, Kos, and KOd SUM159PT cells ( $n = 4$  experimental replicates).  $*P < 0.05$ ,  $**P < 0.01$ , ns., not significant; Mann-Whitney U-test. All data are means  $\pm$  SEM.



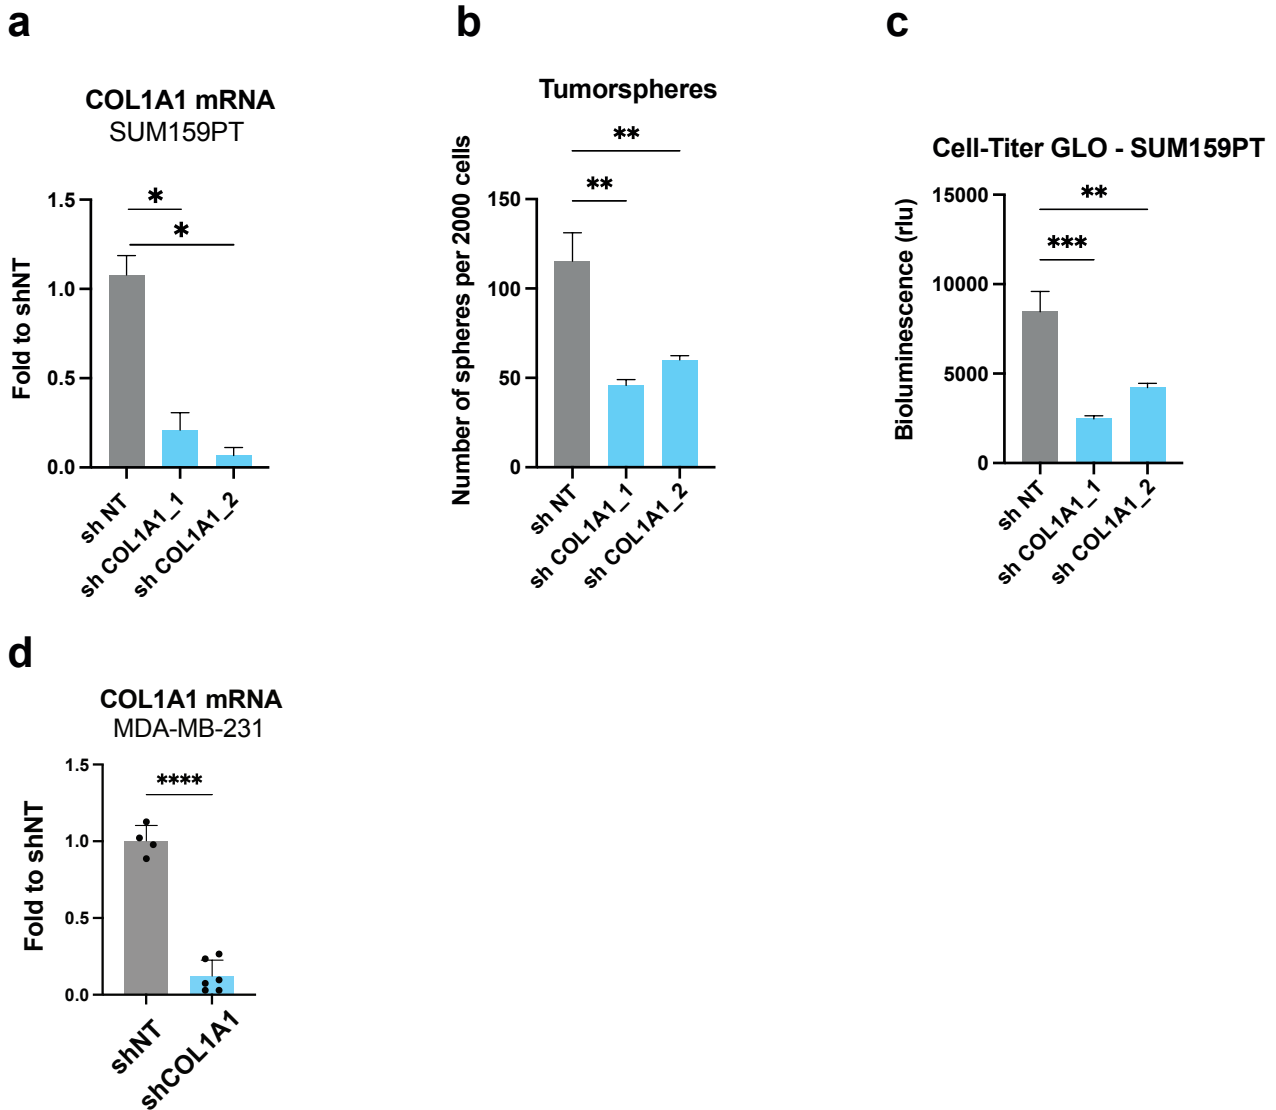

**Appendix Figure S8. COL1A1 ablation decreases tumorsphere formation.**

**a**, Bar graph representing COL1A1 expression in SUM159PT cells expressing sh NT or sh1 and sh2 targeting COL1A1. n = 2 experimental replicates with 2 technical replicates. \*P < 0.05; Mann-Whitney U-test. All data are means  $\pm$  SD.

**b**, Bar graph representing tumorspheres count per 2000 cells seeded in suspension in SUM159PT cells expressing sh NT, sh1 and sh2 targeting COL1A1. n = 4 experimental replicates. \*\*P < 0.01; One-way ANOVA. All data are means  $\pm$  SD.

**c**, Bar graph representing Cell-Titer GLO assay from tumorspheres grown SUM159PT cells expressing sh NT, sh1 and sh2 targeting COL1A1. n = 6 experimental replicates. \*\*P < 0.01, \*\*\*P < 0.001; One-way ANOVA. All data are means  $\pm$  SD.

**d**, Bar graph representing COL1A1 expression in MDA-MB-231 cells expressing sh NT or sh COL1A1. n = 4 replicates. \*\*\*\*P < 0.0001; Mann-Whitney U-test. All data are means  $\pm$  SD.
