# Supplementary material
Source: PubMed Central journal article supplement (PMC10308372)
Supplement: EMBJ-42-e112559-s005.pdf [file EMBJ-42-e112559-s005.pdf]

## Expanded View Figures

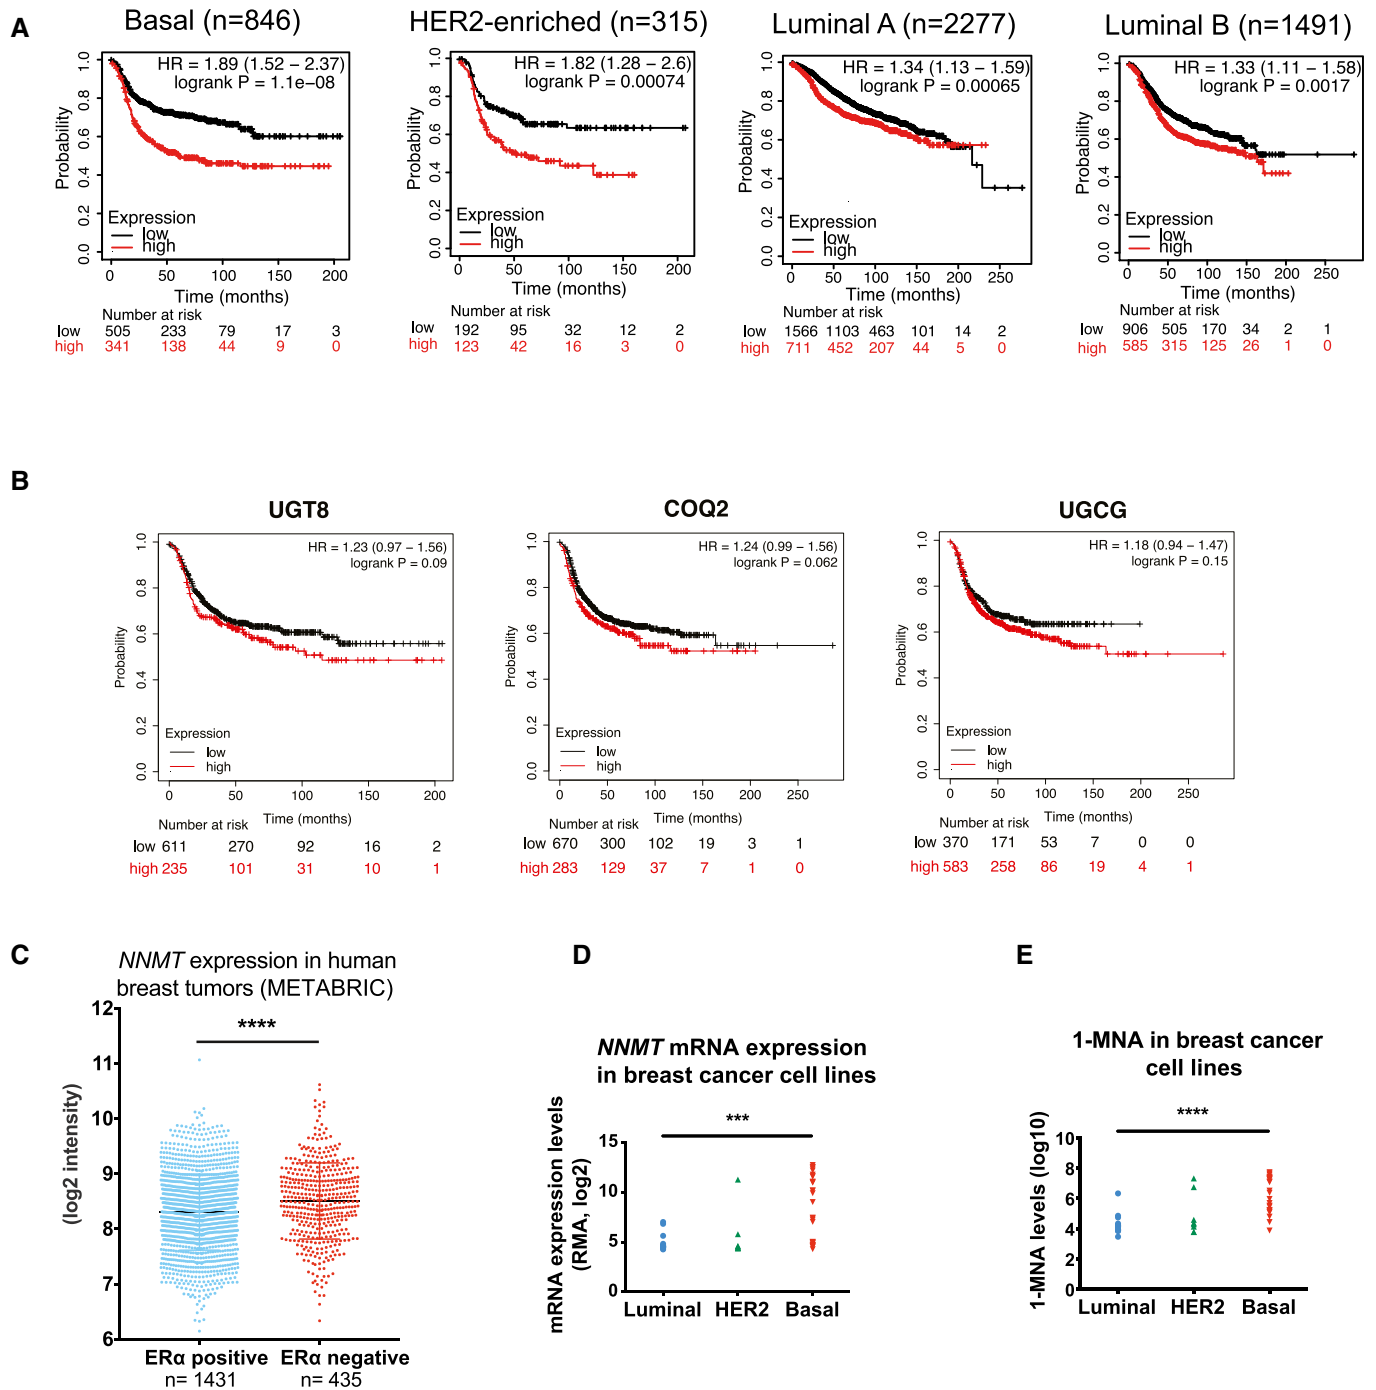

Figure EV1.

**Figure EV1. NNMT predicts poor recurrence-free survival and is highly expressed in ER $\alpha$  negative breast cancer.**

- A Recurrence-free survival plots generated using the Kaplan–Meier Plotter (Györfy *et al*, 2010) based on signal intensity of the NNMT probe (202237\_at) in Affymetrix microarray gene expression data from breast cancer patients of The Cancer Genome Atlas. The cut-off was automatically set to split patients into two groups, high and low. NNMT expression is a strong indicator of poor recurrence-free survival in the basal subset (median survival in months is 37 and 17 in low and high groups, respectively), in the HER2-positive subset (median survival in months is 25.76 and 17 in the low and high groups, respectively), in the Luminal A subset (median survival in months is 91.36 and 57.3 in the low and high groups, respectively), and in the luminal B subset (median survival in months is 50.07 and 37.0 in the low and high groups, respectively). The hazard ratio (95% confidence intervals) and log-rank *P* values for each graph are indicated.
- B Recurrence-free survival plots generated using the Kaplan–Meier Plotter (Györfy *et al*, 2010) based on signal intensity of the UGT8 (208358\_s\_at), COQ2 (213379\_at), UGCG (204881\_s\_at), probes in Affymetrix microarray gene expression data from breast cancer patients of The Cancer Genome Atlas, restricted to the basal subgroup according to the PAM50 classification (*n* = 953). The cut-off was automatically set to split patients into two groups, high and low. The hazard ratio (95% confidence intervals) and log-rank *P* values for each graph are indicated.
- C Dot plot showing NNMT expression in ER $\alpha$ -positive vs ER $\alpha$ -negative breast cancer cases in the METABRIC (Curtis *et al*, 2012; Pereira *et al*, 2016) cohort. \*\*\*\**P* < 0.0001; Student *t*-test. *n* = 1866 patients. Data are means  $\pm$  SD.
- D Dot plot depicting NNMT mRNA expression in breast cancer cell lines from the Cancer Cell Line Encyclopedia (CCLE) atlas (Ghandi *et al*, 2019), \*\*\*\**P* < 0.001; Student *t*-test.
- E Dot plots depicting 1-MNA abundance in breast cancer cell lines from the Cancer Cell Line Encyclopedia (CCLE) atlas (Ghandi *et al*, 2019), \*\*\*\**P* < 0.0001; Student *t*-test.

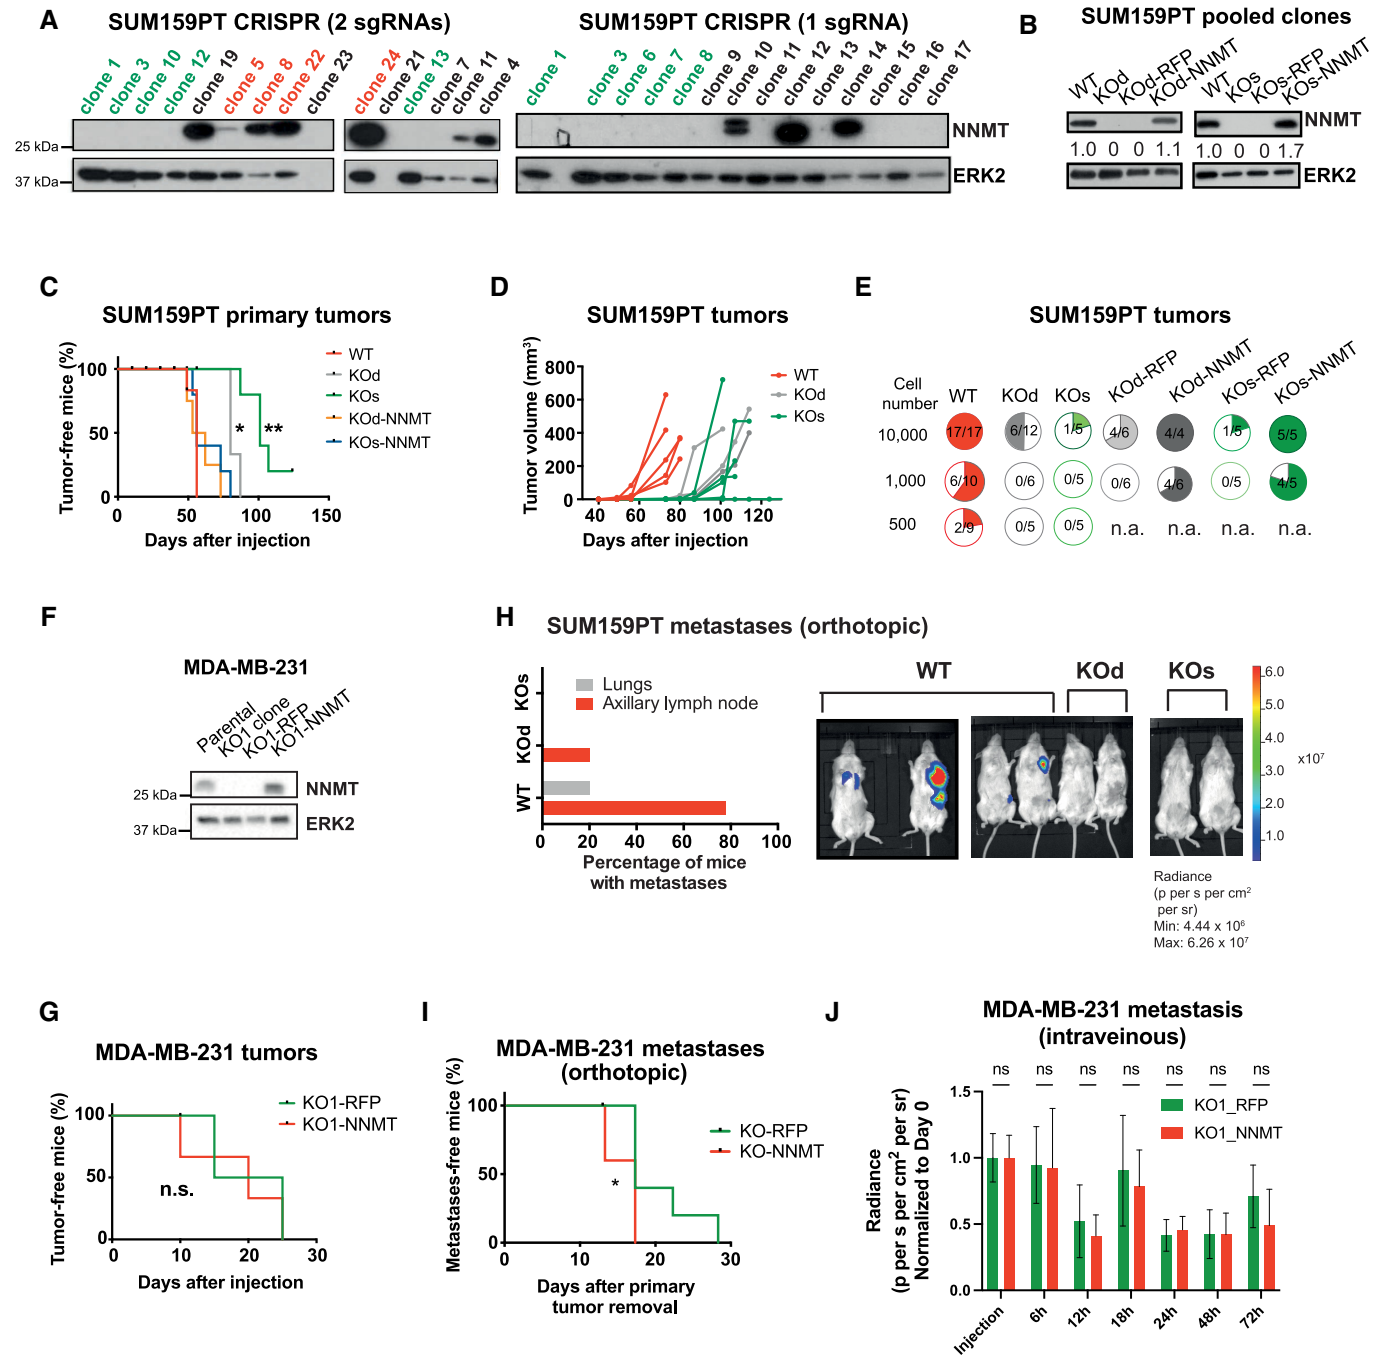

Figure EV2.

**Figure EV2. NNMT depletion reduces metastases formation in basal breast cancer.**

- A Immunoblots showing levels of NNMT and ERK2 (loading control) in single-cell derived clones of SUM159PT after NNMT KO using two independent CRISPR-Cas9 strategies (left: KOd, right: KOs). For each group, single-cell clones were pooled in equal proportions to minimize undesired off-target and clonal effects (in red for WT and green for KOd and KOs).
- B Immunoblots showing NNMT and ERK2 (loading control) levels in SUM159PT KOd, KOs, and WT pooled clones and the respective rescue cell lines.
- C Kaplan–Meier plot depicting tumor onset in mice injected orthotopically with SUM159PT WT (median 56 days;  $n = 5$ ), KO (KOd: median 80 days,  $n = 5$ ; KOs: median 101 days,  $n = 5$ ) or KO-NNMT cells (KOd-NNMT: median 58 days,  $n = 4$ ; KOs-NNMT: median 56 days,  $n = 5$ ). \* $P < 0.05$ , \*\* $P < 0.01$ ; log-rank test.
- D Graph representing the kinetics of SUM159PT WT ( $n = 5$ ), KOd ( $n = 3$ ), and KOs ( $n = 5$ ) tumor growth upon orthotopic injection of 100,000 cells into NSG mice. The median onset (tumor volume approximately 5 mm<sup>3</sup>) is 45, 77 and 85 days for WT, KOd, and KOs tumors, respectively.
- E Quantification of tumor incidence (pie charts) in the SUM159PT model upon orthotopic injection into mice of WT, NNMT KO or NNMT rescue cells.
- F Immunoblots showing NNMT and ERK2 (loading control) levels in MDA-MB-231 parental cells and in a single KO clone (KO1) and the respective rescue cell lines.
- G Kaplan–Meier plot depicting tumor onset in mice injected orthotopically with MDA-MB-231 KO1-RFP (median 20 days;  $n = 5$ ) or KO1-NNMT (median 20 days;  $n = 5$ ). n.s., not significant; log-rank test.
- H Bar plot depicting the proportion of organ-specific metastases in mice injected with SUM159PT WT ( $n = 9$ ) or NNMT KO (KOd,  $n = 5$  and KOs,  $n = 5$ ) cells. Representative bioluminescence images are shown.
- I Kaplan–Meier plot depicting metastasis onset after tumor removal in mice injected with MDA-MB-231 KO1-RFP ( $n = 10$ ) or MDA-MB-231 KO1-NNMT ( $n = 4$ ). \* $P < 0.05$ ; log-rank test. All data are means  $\pm$  SD.
- J Bar graph quantification of luciferase signal from the lungs of NSG mice injected with MDA-MB-231 KO1-RFP or KO1-NNMT cells into the tail vein of mice, right after injection and at 6, 12, 18, 24, 48 and 72 h post-injection.  $n = 5$  animals per group. n.s. not significant; the Mann–Whitney  $U$ -test. All data are means  $\pm$  SD.

**Figure EV3. NNMT depletion promotes loss of basal identity and represses expression of collagens and their processing machinery.**

- A Heat map depicting the 301 concomitantly downregulated genes in SUM159PT KOd and KOs versus WT cells.  $n = 3$  experimental replicates per group. Cut-off: FDR  $< 0.05$ , log<sub>2</sub> fold change  $> 0.85$ .
- B, C Pathway enrichment analyses (B: Metascape, C: Reactome) analysis of the 301 commonly downregulated genes depicted in panel (A).
- D Ingenuity Pathway Analysis (Upstream Regulators) of the 301 commonly downregulated genes depicted in panel (A).
- E Left panel: Representative phase contrast and immunofluorescence images of SUM159PT WT, KOd and KOs cells demonstrating loss of mesenchymal morphology and acquisition of epithelial-like features in NNMT KO cells. Right panel: immunofluorescence quantification ( $n = 3$  experimental replicates) showing decreased protein expression of the mesenchymal fibronectin and vimentin markers and the luminal cytokeratins 8/18 in SUM159PT KOd and KOs cell compared to WT cells. \* $P < 0.5$ , \*\* $P < 0.01$ , \*\*\*\* $P < 0.0001$ ; Student  $t$ -test. Scale bars: 50  $\mu$ m. Data are means  $\pm$  SD.
- F Left panel: Representative images of NNMT immunostaining in normal breast ducts from 35 breast cancer patients showing preferential expression in the basal cell compartment (arrowhead). Right panel: pie chart quantification of the percentage of NNMT-positive cells within the basal and luminal compartments. Scale bar: 100  $\mu$ m.
- G Bar graph representing average mRNA expression of collagens and collagen processing genes in the MDA-MB-231 cell model upon NNMT KO.  $n = 2$ –3 experimental replicates with 2–3 technical replicates each. \* $P < 0.05$ , n.s., not significant; Two-Way ANOVA. All data are means  $\pm$  SD.
- H Venn diagram depicting overlap between the 301 genes commonly downregulated upon NNMT ablation in the SUM159PT KO versus WT comparison and a list of the 10 most described EMT-inducing transcription factors, EMT-TF (*SNAI1*, *SNAI2*, *TWIST1*, *TWIST2*, *ZEB1*, *ZEB2*, *SOX4*, *SOX9*, *FOXC1*, *FOXC2*).
- I Venn diagram depicting overlap between the 301 genes commonly downregulated upon NNMT ablation in the SUM159PT KO versus WT comparison and a list of known collagen binding receptors (*ITGB1*, *ITGA2*, *ITGA10*, *ITGA11*, *DDR1*, *DDR2*, *GP6*, *LAIR1*, *GPR56*).

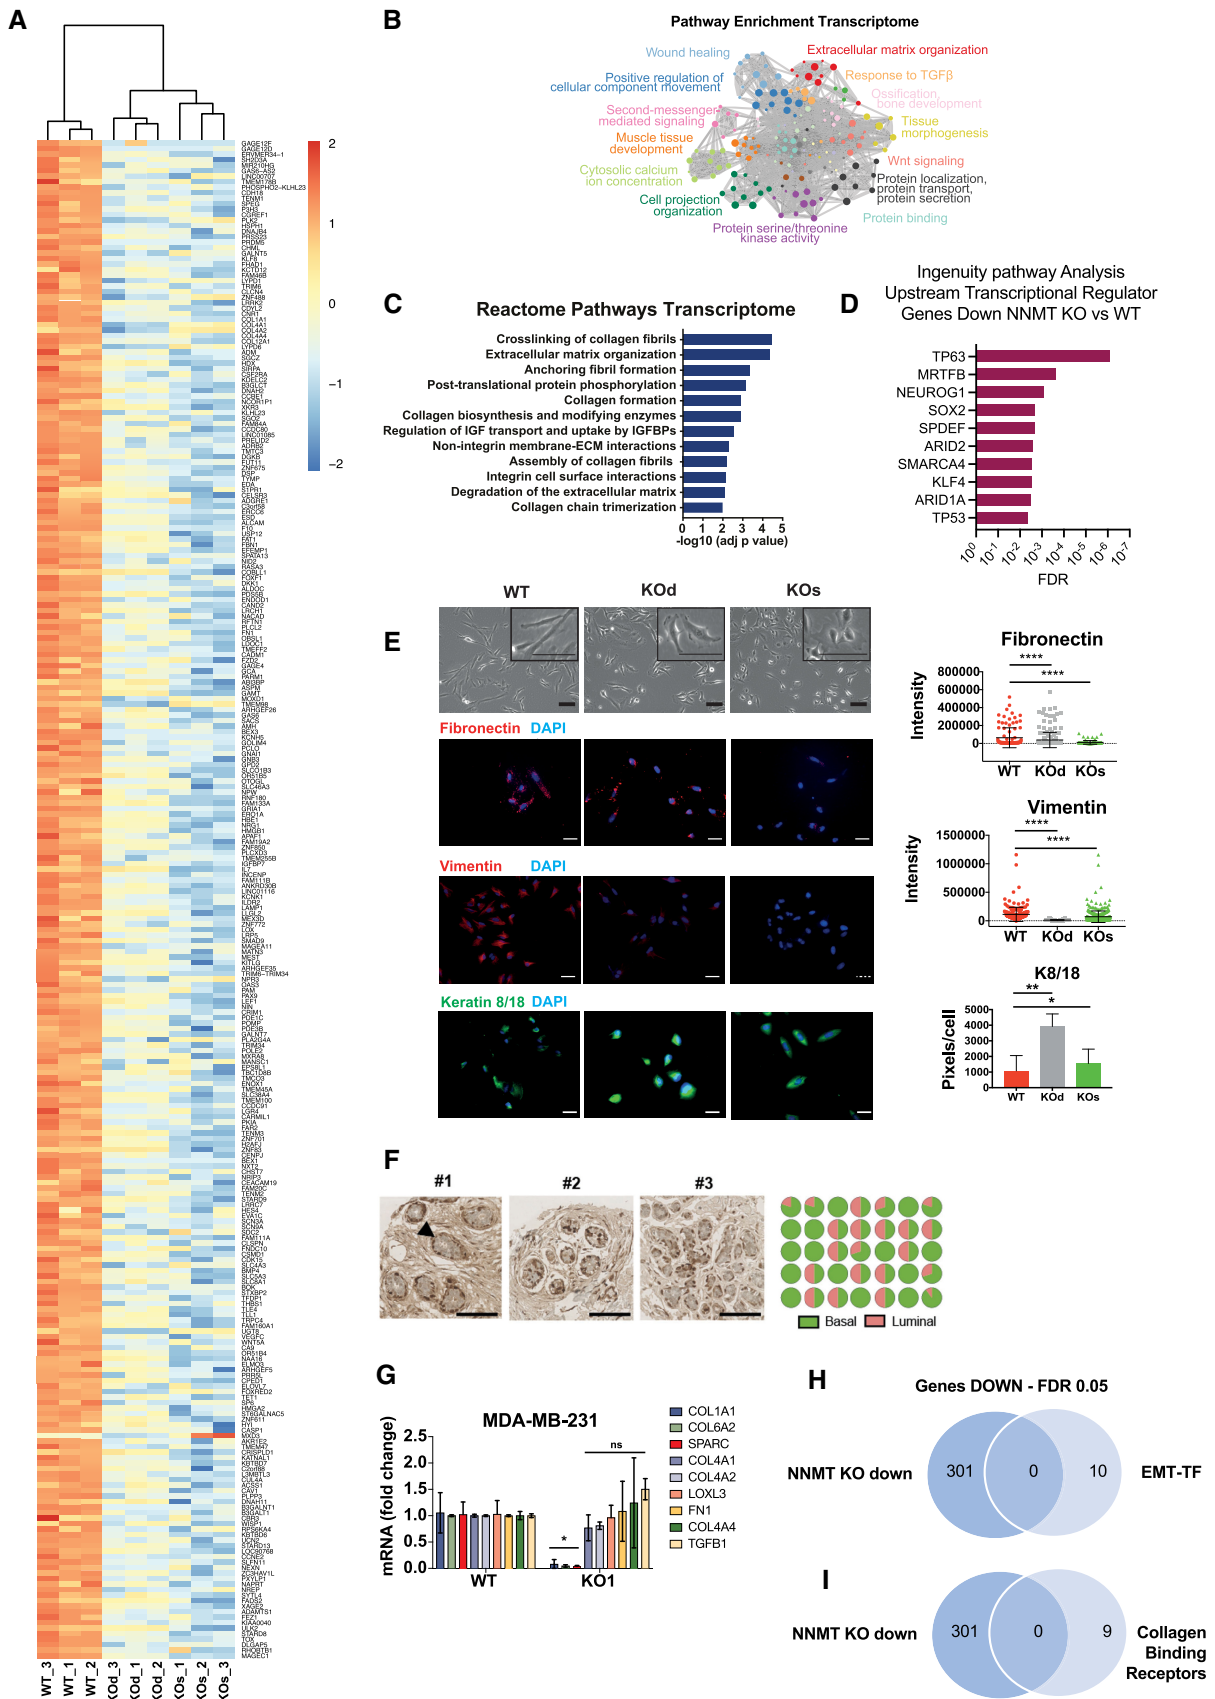

Figure EV3.

**Figure EV4. PRDM5 enhances collagen gene expression and metastatic colonization.**

- A Left panel: Venn diagram depicting the intersection of PRDM5 bound genes (Galli *et al*, 2012) with genes commonly downregulated in NNMT KO and KOd cells.  $n = 3$  experimental replicates. Cut-off: FDR < 0.05, Log<sub>2</sub> fold change > 0.85. Right panel: Pathway analysis (BioPlanet – 2019) of the 18 genes identified in the upper panel. Dark blue bars highlight ECM and collagen-associated terms.
- B Dot plot depicting PRDM5 mRNA expression in SUM159PT WT, KOd, KOd and PRDM5 over-expression lines ( $n = 2$  experimental replicates, with two technical replicates). \*\*\*\* $P < 0.0001$ , n.d., not detected; One-Way ANOVA. Central band indicates the mean.
- C Bar graph representing average collagen gene mRNA expression upon overexpression of PRDM5 from its endogenous promoter using CRISPR-Activating technology in SUM159PT parental cells.  $n = 3$  experimental replicates with two technical replicates each. \* $P < 0.05$ , n.s., not significant; Kruskal–Wallis test. Data are means  $\pm$  SEM.
- D Gene set enrichment analysis (C2 – Curated GSEA, breast cancer-related gene signatures) of the top 500 genes displaying promoter CpG hypermethylation upon NNMT KO (FDR > 0.05).
- E Bar graphs depicting 5-mC abundance at promoters of indicated genes shown as fold enrichment of methylated DNA immunoprecipitate (MedIP) over IgG control.  $n = 3$  experimental replicates with 2 to 3 technical replicates each. n.s., not significant; Kruskal–Wallis test. All data are means  $\pm$  SEM.
- F Bar graphs representing PRDM5 and COL1A1 mRNA expression in MDA-MB-231 cells expressing sh NT or sh PRDM5.  $n = 4$  experimental replicates. \* $P < 0.05$ , \*\* $P < 0.01$ , \*\*\* $P < 0.001$ , n.s., not significant; Mann–Whitney *U*-test. All data are means  $\pm$  SEM.
- G Left panel: bar graph quantification of lung metastatic positive area in the different conditions.  $n = 4$  to 5 lungs per condition. \* $P < 0.05$ , \*\* $P < 0.01$ ; One-way ANOVA. All data are means  $\pm$  SEM. Right panel: representative images of MDA-MB-231 lung metastatic *foci* stained with HE staining, in sh NT and sh PRDM5 experimental conditions. Scale bar: 1 cm.
- H Bar graph showing quantification of Cell Titer GLO assay comparing MDA-MB-231 cells expressing sh NT or sh PRDM5.  $n = 6$  experimental replicates. n.s., not significant; One-way ANOVA. All data are means  $\pm$  SD.

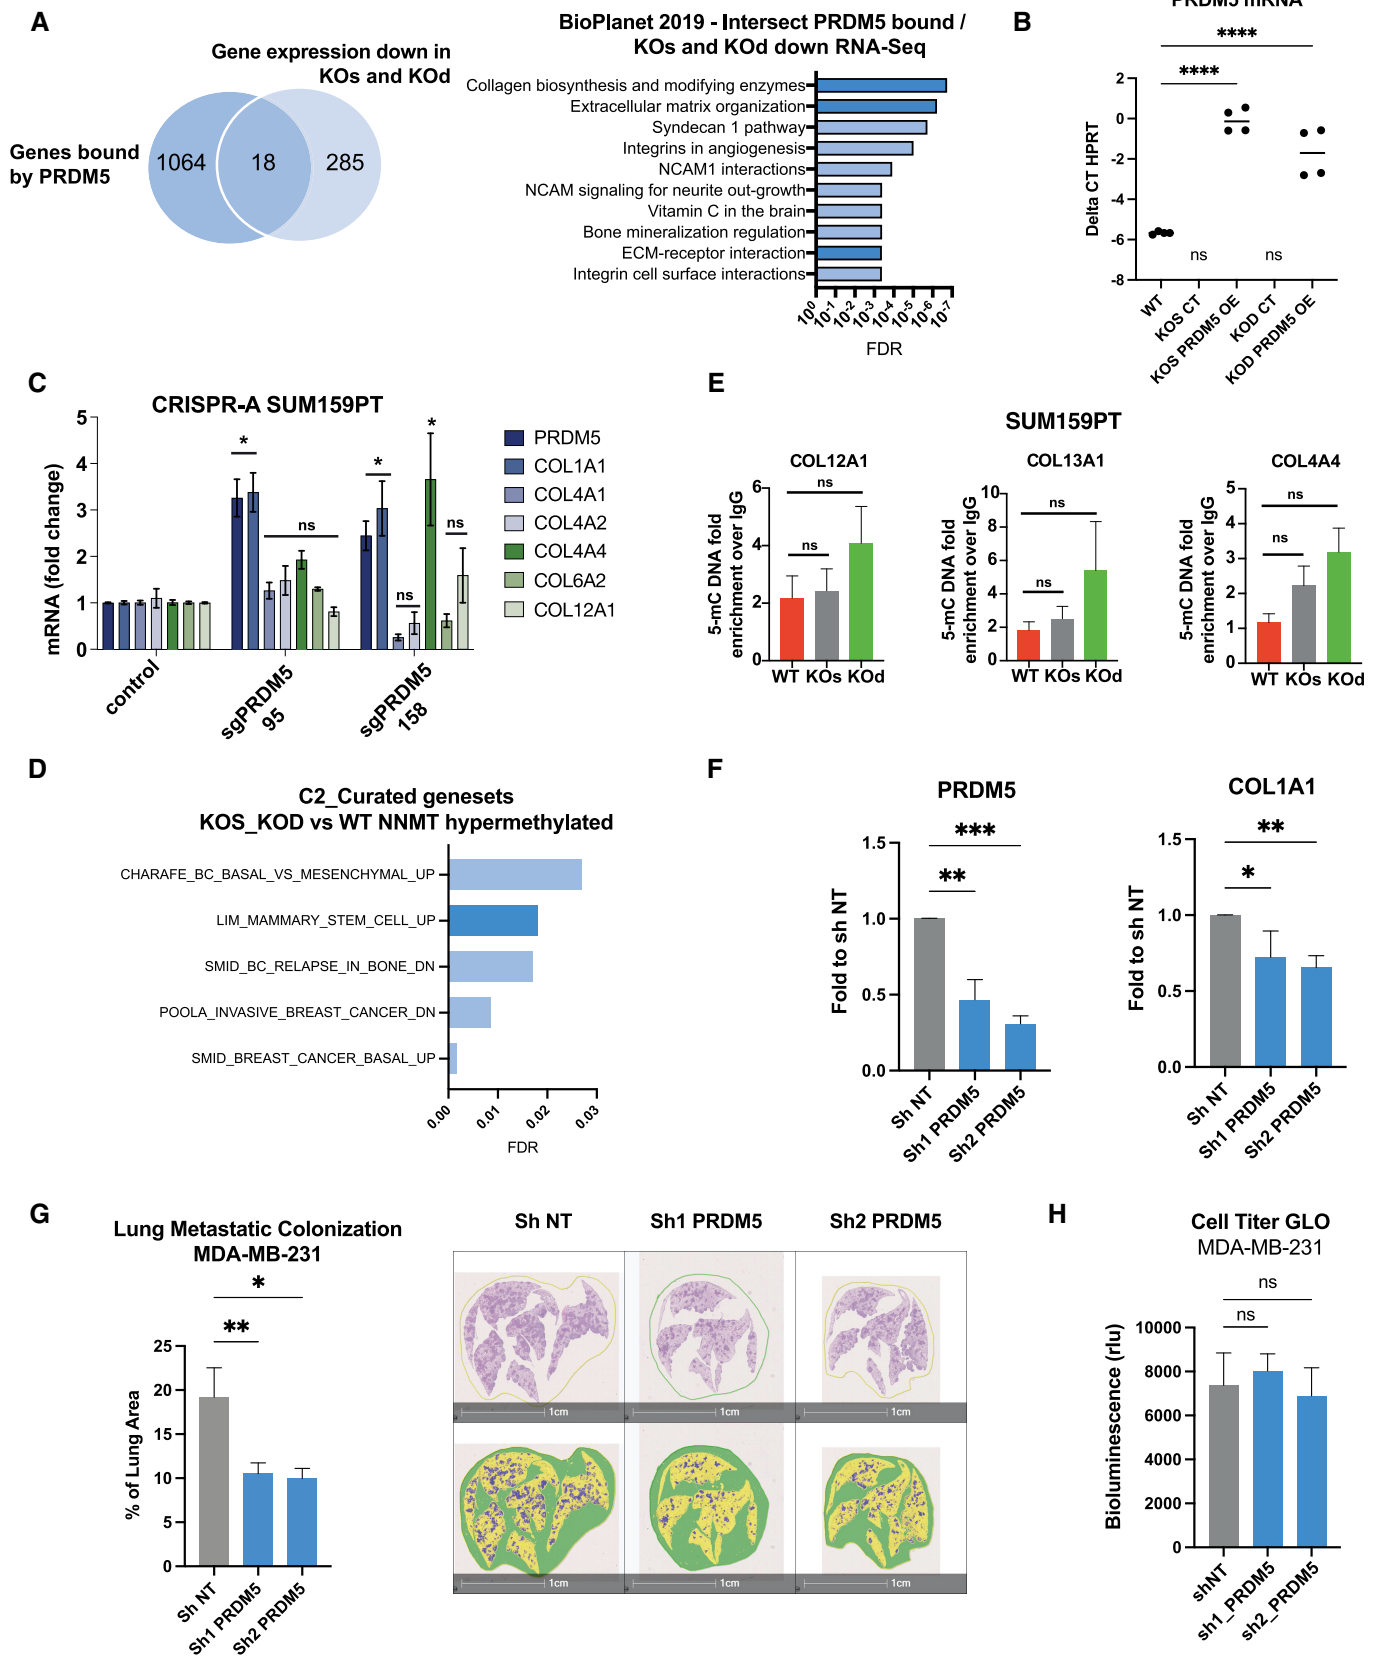

Figure EV4.

**Figure EV5. Immuno-histochemical staining of COL1A1 and PRDM5, digital analysis, and clinical association with relapse-free-survival.**

- A Bar graph showing COL1A1 mRNA expression in MDA-MB-231 KO1\_RFP, KO1\_NNMT and KO1\_COL1A1 (COL1A1 over expression) cells.  $n = 3$  experimental replicates.  $***P < 0.001$ ; One-way ANOVA. All data are means  $\pm$  SD.
- B Bar graph showing quantification of Cell Titer GLO assay comparing MDA-MB-231 cells expressing sh NT or sh COL1A1.  $n = 6$  experimental replicates. n.s., not significant; Student  $t$ -test. Data are means  $\pm$  SD.
- C, D Representative COL1A1 and PRDM5 staining of breast cancer tissues cores of the tissue-microarrays (TMA, left). Classes used for training a deep neural network algorithm: The red area corresponds to the tumor; stroma has been sub-classified into desmoplastic (green) and inflamed (blue) (middle). Heatmap showing differential expression of the respective markers (right). COL1A1; Scale bar, 200  $\mu$ m. PRDM5; Scale bar, 100  $\mu$ m.
- E Dot plot showing COL1A1 expression level (H-Score) across the different sample types: normal tissue ( $n = 76$ ) or primary tumor (PT,  $n = 757$ )  $****P < 0.0001$ , Student  $t$ -test.
- F Dot plot showing COL1A1 expression level (H-Score) across the different areas of the tissue section: tumor epithelium versus stroma ( $n = 857$ ).  $****P < 0.0001$ ; Student  $t$ -test.
- G Bar Graph showing COL1A1 expression level (H-Score) according to the NNMT status within all tumor samples. NNMT (–) negative,  $n = 193$ ; NNMT (+) positive,  $n = 170$ . n.s., non-significant; Student  $t$ -test. Boxes define the upper and lower quartiles; central band indicates the median; whiskers define max to min values.
- H Dot plot showing correlation of PRDM5 (x-axis) and COL1A1 (y-axis) H-scores inferred from HR–negative tumor patient samples from the TMA ( $n = 64$ ),  $*P < 0.05$  correlation  $P$ -value. Pearson index is indicated.
- I Kaplan–Meier plot depicting survival of breast cancer patients stratified according to COL1A1 protein levels (H-Score) specifically in the tumor epithelium area ( $n = 857$ ; median cut-off). Estimated 10-year overall survival rates are 37 (medium/high COL1A1 group) and 43 months (low/negative COL1A1 group), respectively.  $**P < 0.01$ ; log-rank test.
- J Recurrence-free survival plots generated using the Kaplan–Meier Plotter based on signal intensity of COL1A1 (202311\_s\_at) probe in Affymetrix microarray gene expression data from breast cancer patients of The Cancer Genome Atlas (Czyrffy et al, 2010), in the luminal A ( $n = 1809$ ), HER2-enriched ( $n = 695$ ) and basal ( $n = 953$ ) subgroups according to the PAM50 classification. The cut-off was automatically set to split patients into two groups, high and low. The hazard ratio (95% confidence intervals) and log-rank  $P$ -values for each graph are indicated.
- K Kaplan–Meier survival analysis of breast cancer patients stratified according to PRDM5 protein levels (H-Score) specifically in the tumor epithelium area ( $n = 857$ ; median cut-off). Estimated 10-year overall survival rates. n.s., non-significant; log-rank test.



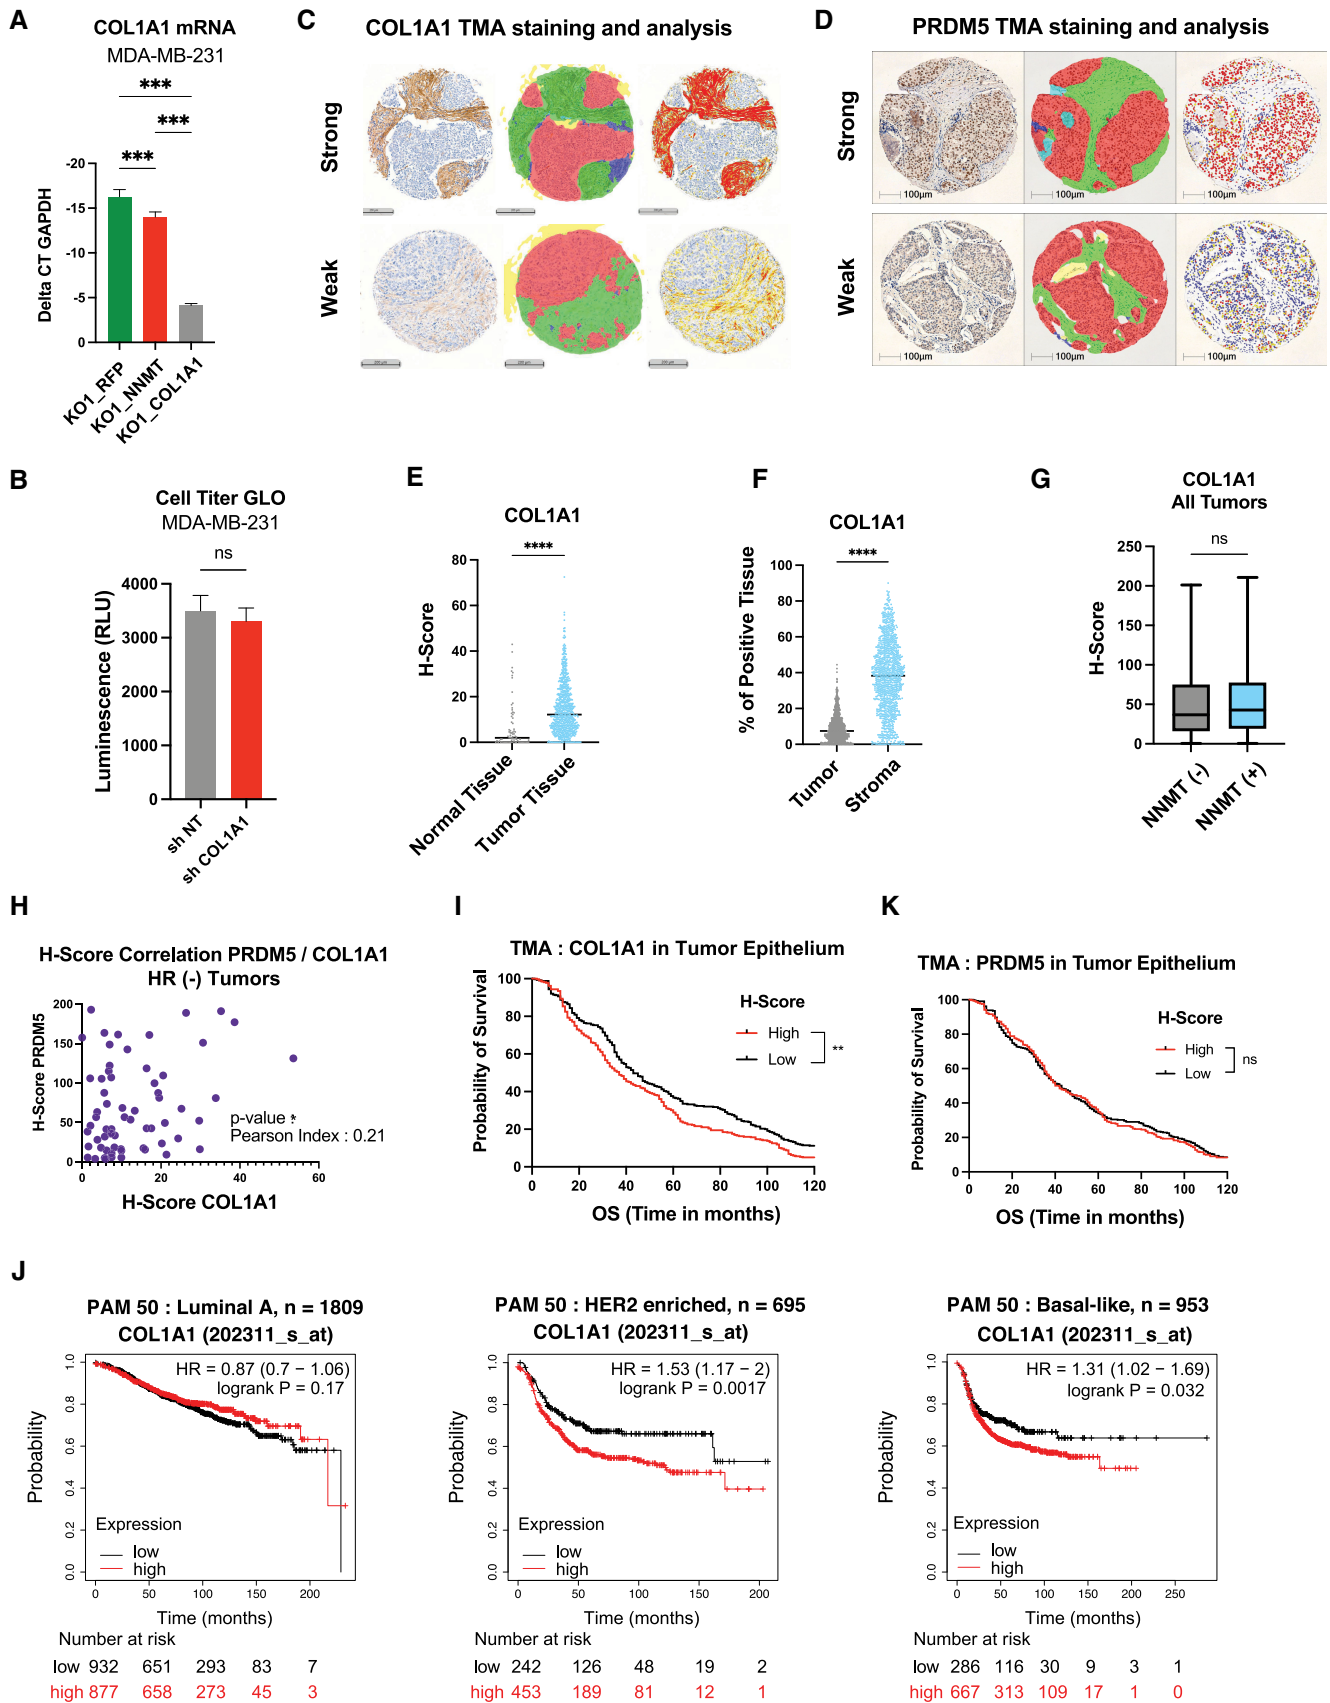

Figure EV5.
